# Supplementary material for: Metabolic profiles of triple-negative and luminal A breast cancer subtypes in African-American identify key metabolic differences
Source: PubMed Central journal article supplement (PMC5837744; doi:10.18632/oncotarget.24433), 2018-02-07
Supplement: oncotarget-09-11677-s001.pdf [file oncotarget-09-11677-s001.pdf]

# Metabolic profiles of triple-negative and luminal A breast cancer subtypes in African-American identify key metabolic differences

## SUPPLEMENTARY MATERIALS

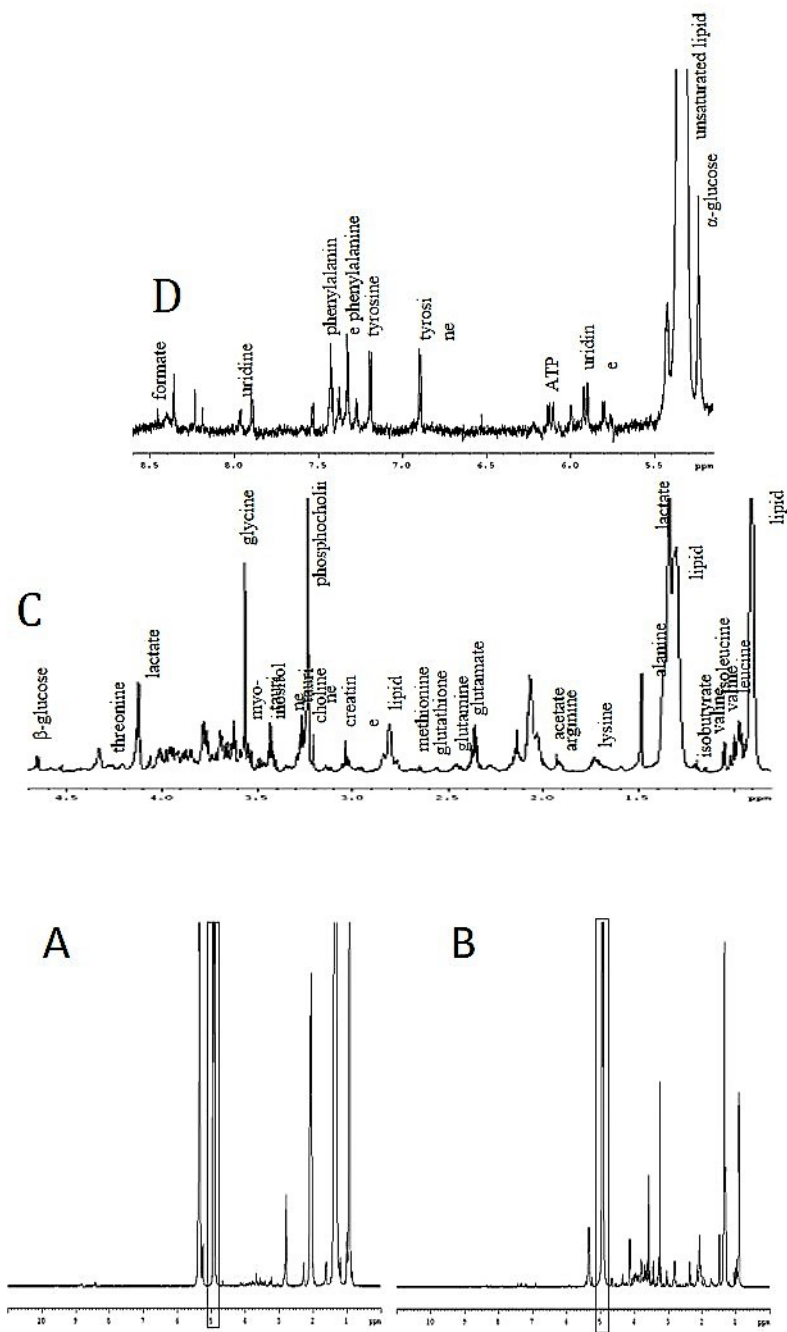

**Supplementary Figure 1:** HR-MAS <sup>1</sup>H NMR spectra of (A) a representative adjacent tissue; (B) a representative breast cancer tissue with the expanded regions shown in (C and D).

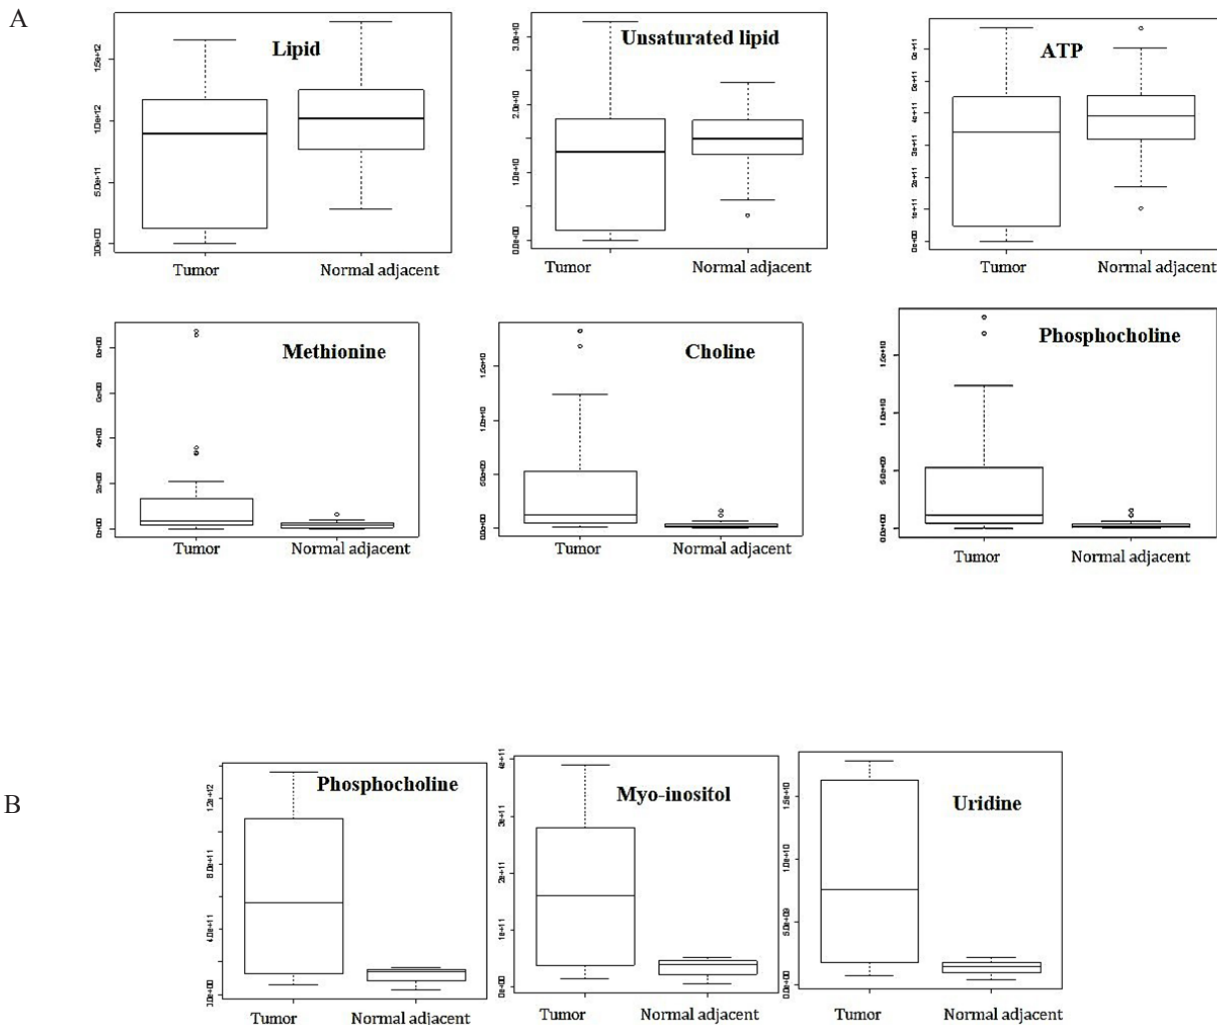

**Supplementary Figure 2:** (A) Box-and-whisker plots of representative metabolites with significantly different ( $p < 0.05$ ) in the tumor compared to normal adjacent tissue for samples from below 50 year-old patients. A horizontal line in the middle portion of the box represents the mean. (B) Box-and-whisker plots of metabolites with significantly higher concentration ( $p$ -values  $< 0.05$ ) in tumor compared to normal adjacent tissues for samples from above 50 year-old patients. Top and bottom boundaries of boxes show the 75th and 25th percentiles, respectively. Upper and lower whiskers show 95th and 5th percentiles, respectively. Open circles outside the box indicate outliers.

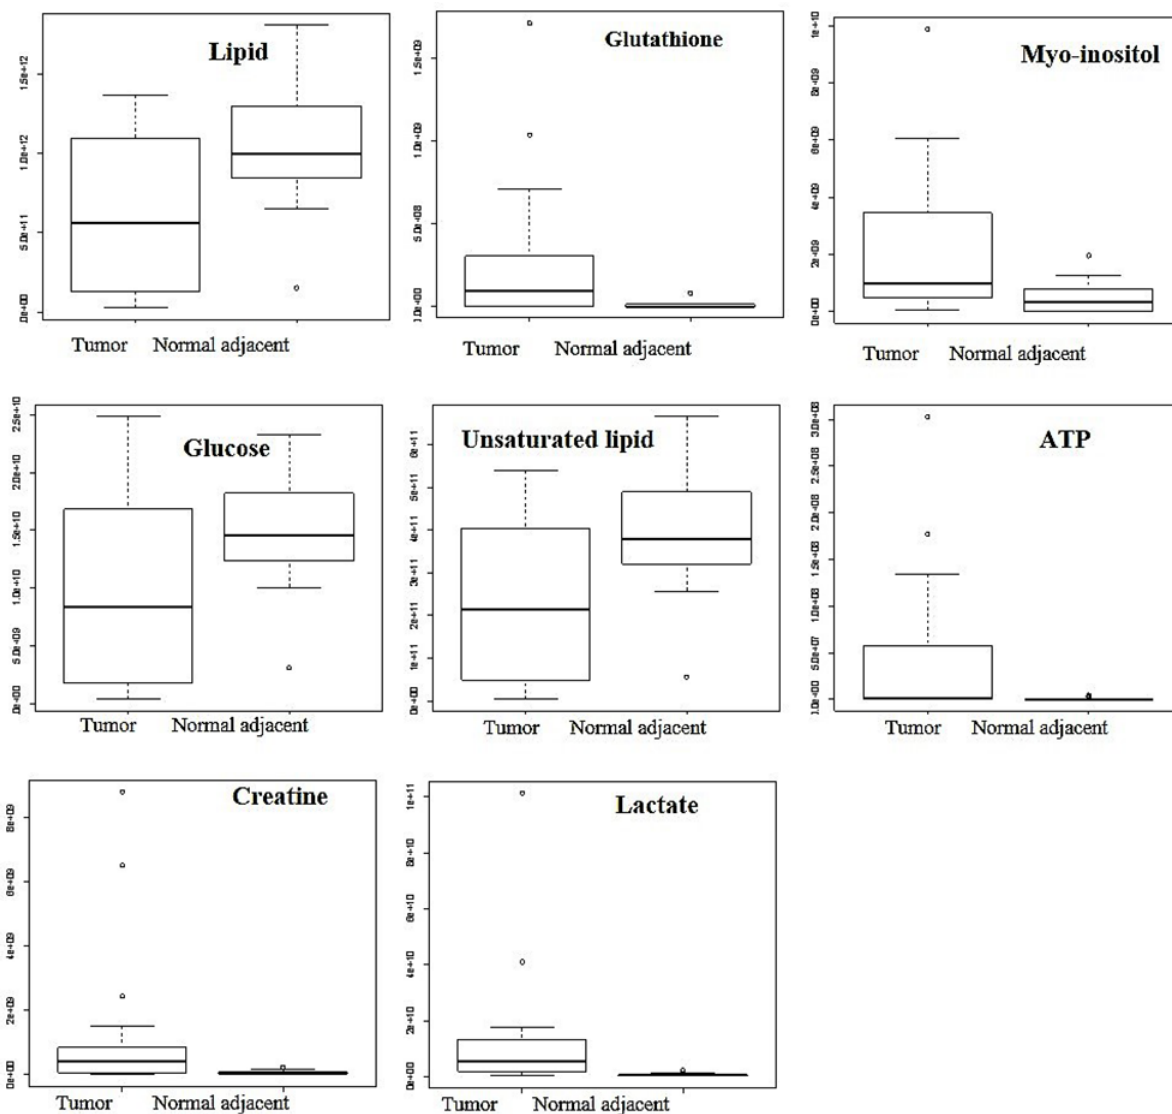

**Supplementary Figure 3: Box-and-whisker plots of metabolites with p-values < 0.05 illustrating discrimination between the tumor and normal adjacent tissues for TNBC samples.** A horizontal line in the middle portion of the box represents the mean. Top and bottom boundaries of boxes show the 75th and 25th percentiles, respectively. Upper and lower whiskers show 95th and 5th percentiles, respectively. Open circles show outliers.

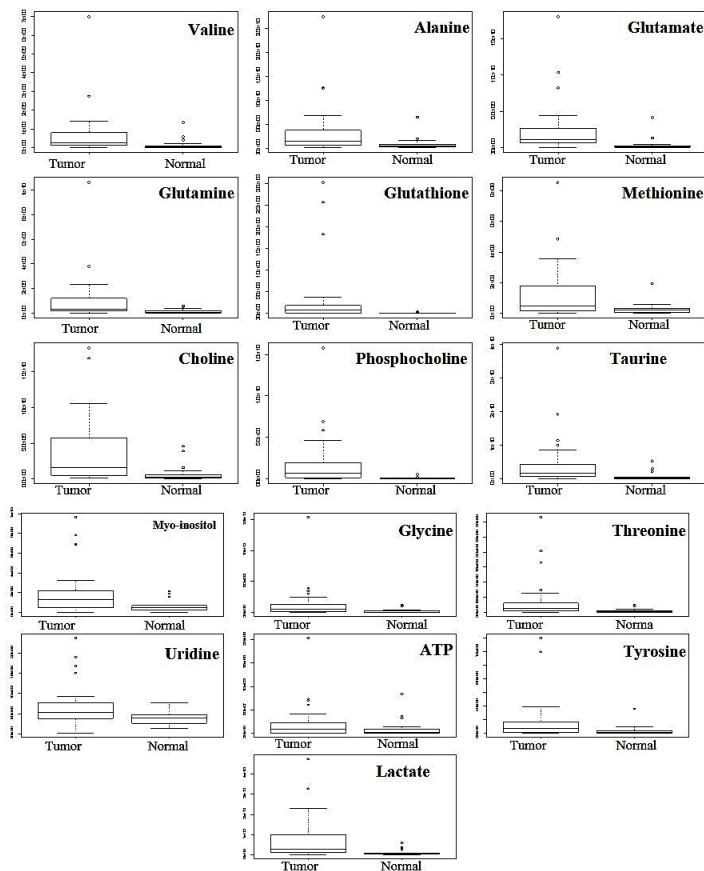

**Supplementary Figure 4: Box-and-whisker plots of metabolites with p-values < 0.05 illustrating discrimination between the tumor and normal adjacent tissues for LABC samples. A horizontal line in the middle portion of the box represents the mean. Top and bottom boundaries of boxes show the 75th and 25th percentiles, respectively. Upper and lower whiskers show 95th and 5th percentiles, respectively. Open circles show outliers.**

**Supplementary Table 1: Quantified metabolites (n=27) in intact breast tumor and adjacent tissue from Caucasian and African American women**

| <b>Metabolite</b> | <b>Metabolite</b> |
|-------------------|-------------------|
| Acetate           | Leucine           |
| Alanine           | Lipid             |
| Arginine          | Lysine            |
| ATP               | Methionine        |
| Glucose           | Myo-inositol      |
| Choline           | Phenylalanine     |
| Creatine          | Phosphocholine    |
| Formate           | Taurine           |
| Glutamate         | Threonine         |
| Glutamine         | Tyrosine          |
| Glutathione       | Unsaturated lipid |
| Glycine           | Uridine           |
| Isobutyrate       | Valine            |
| Lactate           |                   |

**Supplementary Table 2: Comparison of significantly altered metabolic pathways (p<0.05) in African American and Caucasian women with breast cancer**

| African American                                    |         | Caucasian             |         |
|-----------------------------------------------------|---------|-----------------------|---------|
| Pathway                                             | p value | Pathway               | p value |
| Glycolysis or Gluconeogenesis                       | 0.0033  | Pyrimidine metabolism | 0.0428  |
| Propanoate metabolism                               | 0.0034  |                       |         |
| Pyruvate metabolism                                 | 0.0042  |                       |         |
| Inositol phosphate metabolism                       | 0.0073  |                       |         |
| Ascorbate and aldarate metabolism                   | 0.0073  |                       |         |
| Galactose metabolism                                | 0.0078  |                       |         |
| Cysteine and methionine metabolism                  | 0.0097  |                       |         |
| Selenoamino acid metabolism                         | 0.0106  |                       |         |
| Alanine, aspartate and glutamate metabolism         | 0.0118  |                       |         |
| Aminoacyl-tRNA biosynthesis                         | 0.0118  |                       |         |
| Cyanoamino acid metabolism                          | 0.0121  |                       |         |
| Thiamine metabolism                                 | 0.0122  |                       |         |
| Taurine and hypotaurine metabolism                  | 0.0122  |                       |         |
| Porphyrin and chlorophyll metabolism                | 0.0124  |                       |         |
| Primary bile acid biosynthesis                      | 0.0124  |                       |         |
| Glutathione metabolism                              | 0.0124  |                       |         |
| Purine metabolism                                   | 0.0132  |                       |         |
| Lysine degradation                                  | 0.0134  |                       |         |
| Lysine biosynthesis                                 | 0.0162  |                       |         |
| Biotin metabolism                                   | 0.0162  |                       |         |
| Nitrogen metabolism                                 | 0.0166  |                       |         |
| Glutamine and glutamate metabolism                  | 0.0175  |                       |         |
| Vitamin B6 metabolism                               | 0.0175  |                       |         |
| Pyrimidine metabolism                               | 0.0192  |                       |         |
| Phenylalanine metabolism                            | 0.0265  |                       |         |
| Phenylalanine, tyrosine and tryptophan biosynthesis | 0.0265  |                       |         |
| Tyrosine metabolism                                 | 0.0283  |                       |         |
| Ubiquinone and other terpenoid-quinone biosynthesis | 0.0283  |                       |         |
| Glycine, serine and threonine metabolism            | 0.0324  |                       |         |
